# Supplementary material for: Heterojunctions of Mercury Selenide Quantum Dots and Halide Perovskites with High Lattice Matching and Their Photodetection Properties
Source: MDPI journal article supplement (doi:10.3390/ma17081864), 2024-04-18
Supplement: s1 [file s1]

## Supporting Information

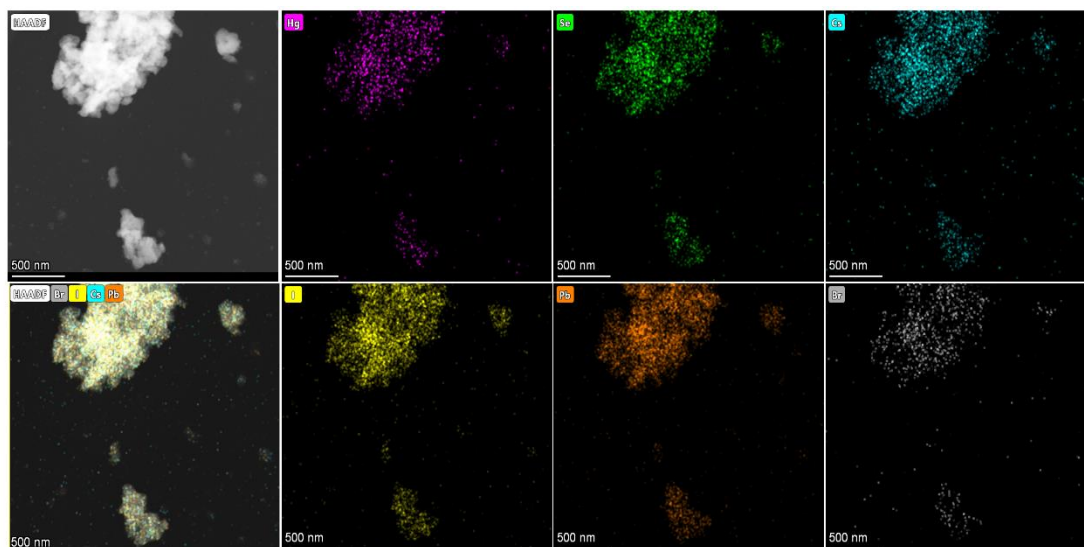

Figure S1. EDS images of elements Hg, Se, Cs, Pb, I, and Br in the HgSe/CsPbBr<sub>x</sub>I<sub>3-x</sub> heterostructure

| Substance                            | $\Theta$ | $\sin\Theta$ | $d_{(110)}$ (Å) | $a$ (Å) |
|--------------------------------------|----------|--------------|-----------------|---------|
| CsPbI <sub>3</sub>                   | 9.9745   | 0.173        | 4.4473          | 6.289   |
| CsPbBr <sub>x</sub> I <sub>3-x</sub> | 10.135   | 0.176        | 4.3715          | 6.182   |

Table S1. Calculation of lattice constants for CsPbBr<sub>x</sub>I<sub>3-x</sub> crystals

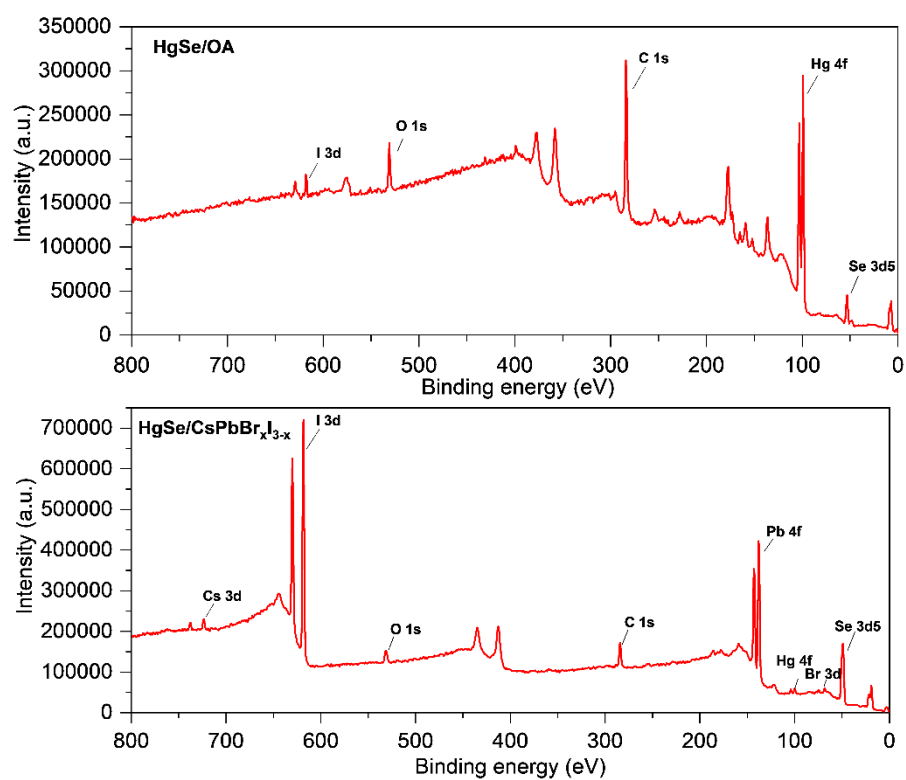

Figure S2. Total XPS spectra of HgSe and HgSe/CsPbBr<sub>x</sub>I<sub>3-x</sub>

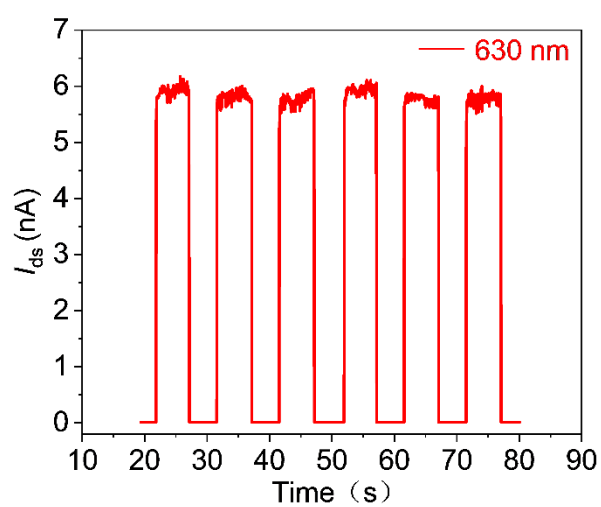

Figure S3. I-T switching curves of CsPbBr<sub>x</sub>I<sub>3-x</sub>
